## Correction: Persistent Activity in Neural Networks with Dynamic Synapses

Omri Barak, Misha Tsodyks

doi: 10.1371/journal.pcbi.0030035

In *PLoS Computational Biology*, volume 3, issue 2:

Equation 28 had incorrect symbols in lines 3, 6, and 7. Here is the correct Equation 28:

$$\begin{aligned}1 - Jux &= -J(\bar{x}\delta + \bar{u}\varepsilon) \\ \frac{d\varepsilon}{dt} &= a + \frac{b}{\bar{x}\delta + \bar{u}\varepsilon} \\ \frac{d\delta}{dt} &= -c - \frac{d}{\bar{x}\delta + \bar{u}\varepsilon} \\ a &= \frac{1 - \bar{x}}{t_f} > 0 \\ b &= \frac{I}{J^2} > 0 \\ c &= \frac{\bar{u} - U}{t_f} > 0 \\ d &= \frac{UI(1 - \bar{u})}{J} > 0\end{aligned}$$

This correction note may be found online at doi:10.1371/journal.pcbi.0030104.

Published May 25, 2007

Citation: (2007) Correction: Persistent activity in neural networks with dynamic synapses. *PLoS Comput Biol* 3(5): e104.
